# Supplementary material for: Repurposing type I–F CRISPR–Cas system as a transcriptional activation tool in human cells
Source: PubMed Central journal article supplement (PMC7305327; doi:10.1038/s41467-020-16880-8), 2020-06-19
Supplement: 41467_2020_16880_MOESM12_ESM.pdf [file 41467_2020_16880_MOESM12_ESM.pdf]

Title: Supplementary Data 1

Description: crRNA sequences in Figure 1, 2, 4, 5, and 6

Title: Supplementary Data 2

Description: crRNA and gRNA sequences for activation efficiency comparison in Figure 3

Title: Supplementary Data 3

Description: the sequences of customized CRISPR arrays in Figure 5

Title: Supplementary Data 4

Description: crRNA and gRNA sequences for detecting off-target activations in Figure 7

Title: Supplementary Data 5

Description: complete sequences of pCsy1-Csy2, pCsy3-VPR-Csy4, and pCsy-crRNA-EV

Title: Supplementary Data 6

Description: DNA sequences for EMSA assay in Figure 1

Title: Supplementary Data 7

Description: quantitative PCR primers used in this study

Title: Supplementary Data 8

Description: predicted off-target sites in Figure 7
